# Supplementary material for: Delayed Antibiotic Therapy and Organ Dysfunction in Critically Ill Septic Patients in the Emergency Department
Source: J Clin Med. 2019 Feb 8;8(2):222. doi: 10.3390/jcm8020222 (PMC6406307; doi:10.3390/jcm8020222)
Supplement: Supplementary file 1 [file jcm-08-00222-s001.pdf]

**Supplementary Table S1.** Univariable regression analysis of the  $\delta$ -platelet count

| Variables                                                  | Regression coefficient | Standard error | <i>p</i> |
|------------------------------------------------------------|------------------------|----------------|----------|
| Timing of antibiotic therapy (per hour delay) <sup>†</sup> | -1.860                 | 0.771          | 0.016    |
| Age (years) <sup>†</sup>                                   | -0.212                 | 0.101          | 0.035    |
| Sex (male)                                                 | 2.494                  | 2.861          | 0.385    |
| Comorbidities                                              |                        |                |          |
| Hypertension                                               | -1.975                 | 2.952          | 0.504    |
| Diabetes                                                   | 4.095                  | 3.253          | 0.209    |
| Cardiac disease                                            | -4.719                 | 4.233          | 0.265    |
| Chronic lung disease                                       | -2.670                 | 5.879          | 0.650    |
| Chronic renal disease <sup>†</sup>                         | -16.900                | 6.364          | 0.008    |
| Chronic liver disease <sup>†</sup>                         | 14.784                 | 5.131          | 0.004    |
| Metastatic solid cancer                                    | -1.237                 | 3.371          | 0.714    |
| Hematologic malignancy <sup>†</sup>                        | 18.407                 | 4.969          | <0.001   |
| Suspected infectious focus                                 |                        |                |          |
| Intra-abdominal                                            | Reference              |                |          |
| Respiratory <sup>†</sup>                                   | 15.710                 | 3.376          | <0.001   |
| Urinary <sup>†</sup>                                       | 14.477                 | 4.603          | 0.002    |
| Other <sup>†</sup>                                         | 14.377                 | 4.152          | 0.001    |
| Positive blood cultures                                    | 0.253                  | 2.885          | 0.930    |
| Resistant bacterial infection                              | -5.121                 | 5.142          | 0.319    |
| APACHE II score <sup>†</sup>                               | -0.391                 | 0.163          | 0.016    |
| Laboratory results                                         |                        |                |          |
| Initial lactate (mmol/L) <sup>†</sup>                      | -3.199                 | 0.480          | <0.001   |
| C-reactive protein (mg/dL) <sup>†</sup>                    | 0.386                  | 0.125          | 0.002    |
| Interventions                                              |                        |                |          |
| Fluid resuscitation within 3 hours (30 ml/kg)              | -2.399                 | 2.835          | 0.398    |
| Fluid input within 24 hours (L) <sup>†</sup>               | -4.166                 | 0.671          | <0.001   |
| Vasopressors <sup>†</sup>                                  | -6.869                 | 2.913          | 0.019    |

The total number of patients was 1525 for  $\delta$ -platelet analysis after excluding if they had received platelet transfusions. Univariable linear regression analysis was used. <sup>†</sup>P-value <0.05 was considered statistically significant. APACHE, Acute Physiology and Chronic Health Evaluation.

**Supplementary Table S2.** Univariable regression analysis of the  $\delta$ -serum bilirubin

| Variables                                                  | Regression coefficient | Standard error | P      |
|------------------------------------------------------------|------------------------|----------------|--------|
| Timing of antibiotic therapy (per hour delay) <sup>†</sup> | 0.044                  | 0.021          | 0.031  |
| Age (years)                                                | -0.003                 | 0.003          | 0.282  |
| Sex (male)                                                 | 0.088                  | 0.077          | 0.249  |
| Comorbidities                                              |                        |                |        |
| Hypertension                                               | 0.025                  | 0.079          | 0.755  |
| Diabetes                                                   | -0.041                 | 0.087          | 0.640  |
| Cardiac disease                                            | 0.058                  | 0.114          | 0.611  |
| Chronic lung disease                                       | -0.149                 | 0.158          | 0.344  |
| Chronic renal disease                                      | 0.196                  | 0.171          | 0.251  |
| Chronic liver disease                                      | 0.121                  | 0.134          | 0.367  |
| Metastatic solid cancer                                    | 0.157                  | 0.090          | 0.082  |
| Hematologic malignancy <sup>†</sup>                        | 0.510                  | 0.124          | <0.001 |
| Suspected infectious focus                                 |                        |                |        |
| Intra-abdominal <sup>†</sup>                               | Reference              |                |        |
| Respiratory                                                | 0.349                  | 0.091          | <0.001 |
| Urinary                                                    | 0.237                  | 0.123          | 0.055  |
| Other <sup>†</sup>                                         | 0.370                  | 0.110          | 0.001  |
| Positive blood cultures                                    | -0.105                 | 0.077          | 0.173  |
| Resistant bacterial infection <sup>†</sup>                 | -0.281                 | 0.137          | 0.041  |
| APACHE II score <sup>†</sup>                               | 0.025                  | 0.004          | <0.001 |
| Laboratory results                                         |                        |                |        |
| Initial lactate (mmol/L) <sup>†</sup>                      | 0.084                  | 0.013          | <0.001 |
| C-reactive protein (mg/dL)                                 | 0.006                  | 0.003          | 0.088  |
| Interventions                                              |                        |                |        |
| Fluid resuscitation within 3 hours (30 ml/kg)              | 0.099                  | 0.076          | 0.192  |
| Fluid input within 24 hours (L) <sup>†</sup>               | 0.068                  | 0.018          | <0.001 |
| Vasopressors <sup>†</sup>                                  | 0.261                  | 0.078          | 0.001  |

The total number of patients was 1784. Univariable linear regression analysis was used. <sup>†</sup>P-value <0.05 was considered statistically significant. APACHE, Acute Physiology and Chronic Health Evaluation.

**Supplementary Table S3.** Univariable regression analysis of the  $\delta$ -serum creatinine

| Variables                                                  | Regression coefficient | Standard error | <i>p</i> |
|------------------------------------------------------------|------------------------|----------------|----------|
| Timing of antibiotic therapy (per hour delay)              | 0.018                  | 0.011          | 0.100    |
| Age (years)                                                | 0.001                  | 0.001          | 0.491    |
| Sex (male)                                                 | 0.030                  | 0.040          | 0.453    |
| Comorbidities                                              |                        |                |          |
| Hypertension                                               | -0.010                 | 0.042          | 0.804    |
| Diabetes                                                   | 0.036                  | 0.046          | 0.429    |
| Cardiac disease                                            | 0.100                  | 0.060          | 0.098    |
| Chronic lung disease <sup>†</sup>                          | 0.202                  | 0.081          | 0.013    |
| Chronic renal disease                                      | 0.090                  | 0.121          | 0.460    |
| Chronic liver disease                                      | -0.013                 | 0.071          | 0.856    |
| Metastatic solid cancer                                    | -0.014                 | 0.046          | 0.762    |
| Hematologic malignancy                                     | 0.112                  | 0.065          | 0.085    |
| Suspected infectious focus                                 |                        |                |          |
| Intra-abdominal                                            | Reference              |                |          |
| Respiratory <sup>†</sup>                                   | 0.185                  | 0.047          | <0.001   |
| Urinary                                                    | -0.074                 | 0.063          | 0.244    |
| Other                                                      | 0.063                  | 0.057          | 0.272    |
| Positive blood cultures                                    | -0.028                 | 0.040          | 0.484    |
| Resistant bacterial infection                              | -0.031                 | 0.072          | 0.667    |
| APACHE II score <sup>†</sup>                               | -0.005                 | 0.002          | 0.029    |
| Laboratory results                                         |                        |                |          |
| Initial lactate (mmol/L)                                   | -0.015                 | 0.008          | 0.052    |
| C-reactive protein (mg/dL) <sup>†</sup>                    | -0.015                 | 0.002          | <0.001   |
| Interventions                                              |                        |                |          |
| Fluid resuscitation within 3 hours (30 ml/kg) <sup>†</sup> | -0.230                 | 0.039          | <0.001   |
| Fluid input within 24 hours (L) <sup>†</sup>               | -0.051                 | 0.009          | <0.001   |
| Vasopressors <sup>†</sup>                                  | -0.185                 | 0.040          | <0.001   |

The total number of patients was 1604 after excluding if they received renal replacement therapy. Univariable linear regression analysis was used. <sup>†</sup>P-value <0.05 was considered statistically significant. APACHE, Acute Physiology and Chronic Health Evaluation.

**Supplementary Table S4.** Univariable regression analysis of the  $\delta$ - PaO<sub>2</sub>/FiO<sub>2</sub> ratio

| Variables                                                  | Regression coefficient | Standard error | <i>p</i>           |
|------------------------------------------------------------|------------------------|----------------|--------------------|
| Timing of antibiotic therapy (per hour delay)              |                        |                |                    |
| Age (years)                                                | 0.217                  | 0.244          | 0.374              |
| Sex (male)                                                 | -7.811                 | 6.963          | 0.262              |
| Comorbidities                                              |                        |                |                    |
| Hypertension                                               | 12.497                 | 7.181          | 0.082              |
| Diabetes <sup>†</sup>                                      | 19.039                 | 7.917          | 0.016              |
| Cardiac disease <sup>†</sup>                               | 22.246                 | 10.321         | 0.031              |
| Chronic lung disease                                       | 15.581                 | 14.412         | 0.280              |
| Chronic renal disease                                      | 8.324                  | 15.487         | 0.591              |
| Chronic liver disease                                      | -3.122                 | 12.211         | 0.798              |
| Metastatic solid cancer <sup>†</sup>                       | -19.151                | 8.231          | 0.020              |
| Hematologic malignancy                                     | -0.242                 | 11.267         | 0.983              |
| Suspected infectious focus                                 |                        |                |                    |
| Intra-abdominal                                            | Reference              |                |                    |
| Respiratory <sup>†</sup>                                   | 19.156                 | 8.288          | 0.021              |
| Urinary                                                    | 29.727                 | 11.161         | 0.008 <sup>†</sup> |
| Other                                                      | 13.946                 | 10.060         | 0.166              |
| Positive blood cultures <sup>†</sup>                       | -27.617                | 6.979          | <0.001             |
| Resistant bacterial infection                              | 15.794                 | 12.589         | 0.210              |
| APACHE II score <sup>†</sup>                               | 1.884                  | .387           | <0.001             |
| Laboratory results                                         |                        |                |                    |
| Initial lactate (mmol/L) <sup>†</sup>                      | -6.100                 | 1.186          | <0.001             |
| C-reactive protein (mg/dL)                                 | -1.301                 | 0.304          | <0.001             |
| Interventions                                              |                        |                |                    |
| Fluid resuscitation within 3 hours (30 ml/kg) <sup>†</sup> | 16.396                 | 6.884          | 0.017              |
| Fluid input within 24 hours (L) <sup>†</sup>               | -9.503                 | 1.636          | <0.001             |
| Vasopressors <sup>†</sup>                                  | -24.218                | 7.079          | 0.001              |

The total number of patients was 1780 after excluding patients with missing values. Univariable linear regression analysis was used. <sup>†</sup>P-value <0.05 was considered statistically significant. APACHE, Acute Physiology and Chronic Health Evaluation.
